# Supplementary material for: A rapid and highly sensitive ctDNA detection platform based on locked nucleic acid-assisted catalytic hairpin assembly circuits
Source: Royal Society of Chemistry journal article supplement (doi:10.1039/d3ay01150j), 2023-01-01
Supplement: d3ay01150j1.pdf [file d3ay01150j1.pdf]

Supporting Information

## **A rapid and highly sensitive ctDNA detection platform based on locked nucleic acids-assisted CHA circuits**

Kaiyue Tan,<sup>a, b, c</sup> Longsheng Chen,<sup>a, b, c</sup> Donglin Cao,<sup>d</sup> Wei Xiao,<sup>d</sup> Qian Lv<sup>a, b, c</sup> and Lili Zou<sup>a, b, c\*</sup>

<sup>a</sup>Institute of Biological and Medical Engineering, Guangdong Academy of Sciences, Guangzhou 510632, P. R. China

<sup>b</sup>Guangdong Engineering Technology Research Center for Diagnosis and Rehabilitation of Dementia, Guangzhou 510500, China.

<sup>c</sup>Guangdong Key Lab of Medical Electronic Instruments and Polymer Material Products, Guangzhou 510632, PR China.

<sup>d</sup>Department of Laboratory Medicine, Guangdong Provincial Key Laboratory of Point-of-care Testing (POCT), Guangdong Second Provincial General Hospital, Guangzhou 510500, China

\*Corresponding author: Lili Zou, lilizou@mail.ustc.edu.cn.

## Table of Contents

|                                                                                                                     |     |
|---------------------------------------------------------------------------------------------------------------------|-----|
| <b>Table S1.</b> The DNA sequences used to construct updated CHA system.....                                        | S3  |
| <b>Fig. S1</b> The updated CHA system triggered by target ctDNA.....                                                | S4  |
| <b>Fig. S2</b> Design of the fluorescent reporter in the CHA system.....                                            | S5  |
| <b>Fig. S3</b> Optimized hairpin structures of the CHA constructs.....                                              | S6  |
| <b>Fig. S4</b> Optimized hairpin concentrations of the updated CHA system.....                                      | S7  |
| <b>Fig. S5</b> Optimized reaction temperature of the updated CHA system.....                                        | S8  |
| <b>Fig. S6</b> Optimized reaction time of the updated CHA system.....                                               | S9  |
| <b>Fig. S7</b> Fluorescence response of CHA system in different LNA modifications.....                              | S10 |
| <b>Fig. S8</b> Fluorescence kinetics of LNA-modified and regular CHA system.....                                    | S11 |
| <b>Fig. S9</b> The comparison of updated CHA system relative to MB system.....                                      | S12 |
| <b>Table S2.</b> Comparison of analytical performances of different ctDNA biosensors.....                           | S13 |
| <b>Fig. S10</b> Fluorescence response of H <sub>1</sub> alone, H <sub>2</sub> alone, and the intact CHA system..... | S14 |
| <b>Fig. S11</b> Fluorescence response of CHA system in different ratios of serum.....                               | S15 |
| <b>Fig. S12</b> Comparison of commercial thermostatic nucleic acid amplification kit.....                           | S16 |
| <b>References.</b> .....                                                                                            | S17 |

**Table S1** Sequences of the oligonucleotides for ctDNA-initiated catalytic hairpin assembly (CHA) system.

| Name                                         | Sequence(5'-3')                                                                                            |
|----------------------------------------------|------------------------------------------------------------------------------------------------------------|
| <b>PIK3CA E542K</b><br>(Target ctDNA)        | CTCAGTGA(3*) TTTTAGA(2*) GAGAGGAT(1*)                                                                      |
| <b>DNA-H<sub>1</sub></b>                     | ATCCTCTC(1) TCTAAAA(2) TCACTGAG(3)<br>CCATGTGTAGA(4*) CTCAGTGA(3*) TTTTAGA(2*)<br>CCTTGTC(5*) TAGAGCAC(6*) |
| <b>H<sub>1</sub></b>                         | ATCCTCTC TCTAAAA TCACTGAG CCATGTGTAGA<br>CTCAGTGA TTTTAGA CCTTGTC TAGAGCAC                                 |
| <b>H<sub>1-s</sub></b>                       | ATCCTCTC TCTAAAA TCACTGAG CCATGTGTAGA<br>CTCAGTGA TTTTAGA CCTTGTC TAGAGCAC                                 |
| <b>H<sub>1-r</sub></b>                       | ATCCTCTC TCTAAAA TCACTGAG CCATGTGTAGA<br>CTCAGTGA TTTTAGA CCTTGTC TAGAGCAC                                 |
| <b>DNA-H<sub>2</sub></b>                     | TCACTGAG(3) TCTACACATGG(4) CTCAGTGA(3*)<br>TTTTAGA(2*) CCATGTGTAGA(4*)                                     |
| <b>H<sub>2</sub></b>                         | TCACTGAG TCTACACATGG CTCAGTGA TTTTAGA<br>CCATGTGTAGA                                                       |
| <b>Reporter-F</b><br>(Rep-F)                 | FAM-CGA GTGCTCTA TGACAAGG TCTAAAA                                                                          |
| <b>Regular Rep-F</b>                         | FAM-CGA GTGCTCTA TGACAAGG TCTAAAA                                                                          |
| <b>Reporter-Q</b><br>(Rep-Q)                 | CCTTGTC TAGAGCAC TCG-BHQ-1                                                                                 |
| <b>KRAS G12DM</b>                            | ACT CTT GCC TAC GCC ATC AGC TCC AAC TAC CAC AAG<br>TTT                                                     |
| <b>EGFR L858R</b>                            | CAG CAG TTT GGC CAG CCC AAA ATC TGT GAT CTT GAC<br>ATG                                                     |
| <b>BRAF V600E</b>                            | GAT TTT GGT CTA GCT ACA GAG AAA TCT CGA TGG AGT<br>GGG                                                     |
| <b>1-Mut</b>                                 | CTC AGT GAT TTA AGA GAG AGG AT                                                                             |
| <b>2-Mut</b>                                 | CTC AGT GAT TTA AGA GTG AGG AT                                                                             |
| <b>3-Mut</b>                                 | CTC AGA GAT TTA AGA GTG AGG AT                                                                             |
| <b>Molecular Beacon</b><br>(H <sub>3</sub> ) | FAM-GCT AGC ATC CTC TCT CTA AAA TCA CTG AGG CTA<br>GC-BHQ-1                                                |

Red letters denote locked nucleic acid bases.

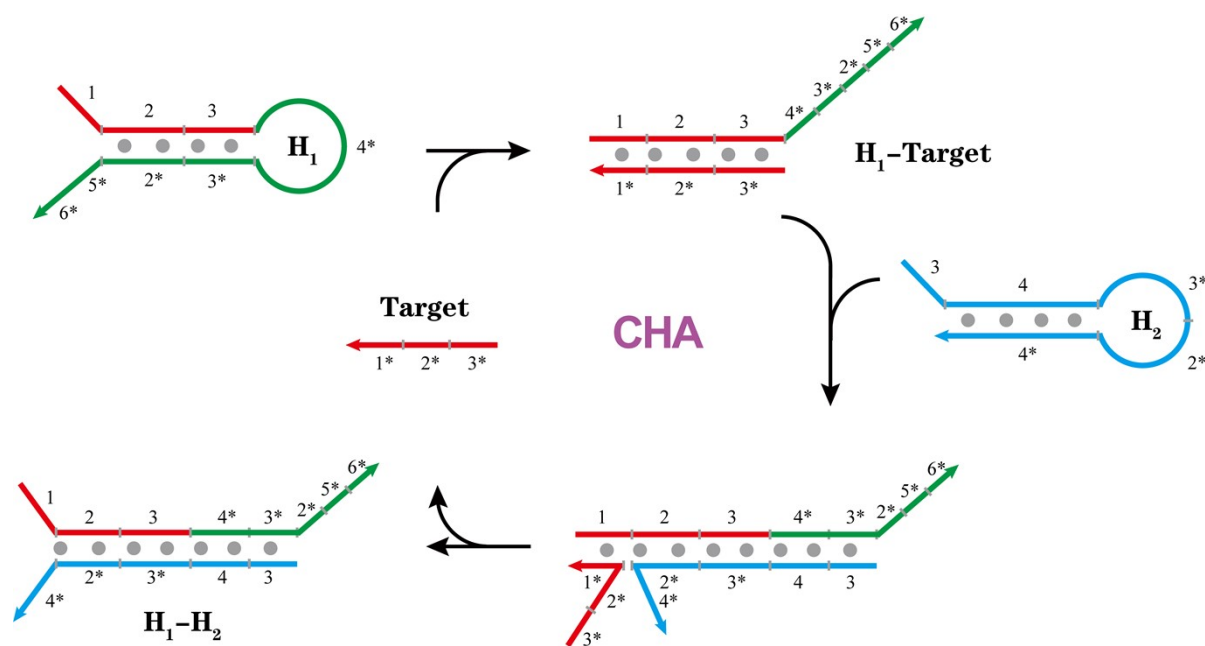

**Fig. S1** Proposed scheme of updated LNA-assisted catalyzed hairpin assembly (CHA) system triggered by target ctDNA. Two pairs of LNAs are respectively incorporated near the stem-end of hairpin H<sub>1</sub> and H<sub>2</sub> (detailed site, see **Table S1**). Arrows of DNA strands denote 3'-termini. Gray circles denote base-pairing. The numbers of domains are complementary to the corresponding asterisks. Short gray dashes denote the junctions between domains.

The CHA reaction is consisted of the two hairpins (H<sub>1</sub> and H<sub>2</sub>). The sequence 1-2-3 of hairpin H<sub>1</sub> is complementary to the sequence 1\*-2\*-3\* of target ctDNA. And the stem domain 3\* of hairpin H<sub>1</sub> is complementary to the toehold region 3 of hairpin H<sub>2</sub>. Hairpin H<sub>2</sub> is encoded with a partially complementary sequence 3\*-4\*-3-2 to hairpin H<sub>1</sub>. Target ctDNA firstly opens hairpin H<sub>1</sub> via a toehold-mediated strand displacement, leading to the formation of H<sub>1</sub>-target hybrid. And the newly exposed sticky sequence 3\* of hairpin H<sub>1</sub> docks to the toehold 3 of hairpin H<sub>2</sub>, and then opens hairpin H<sub>2</sub> via branch-migration, leading to the assembly of H<sub>1</sub>-H<sub>2</sub> duplex DNA and the regeneration of target ctDNA for next CHA reaction. Thus, target ctDNA stimulates the efficient CHA reaction, leading to the successive hybridizations between hairpins H<sub>1</sub> and H<sub>2</sub>, and continuously generating H<sub>1</sub>-H<sub>2</sub> product.

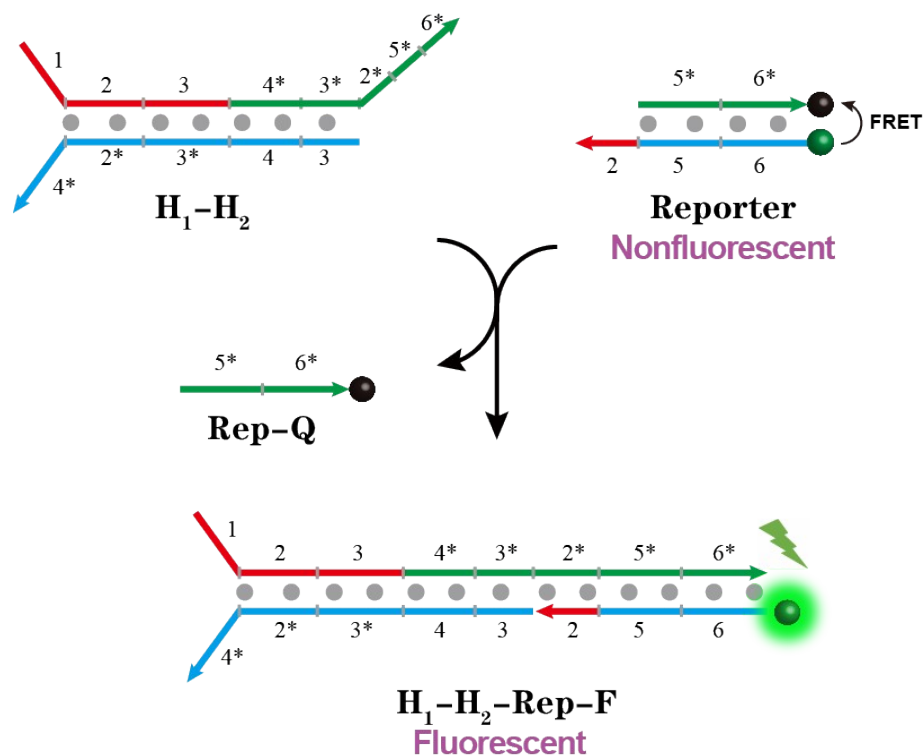

**Fig. S2** Design diagram of the fluorescent reporter in updated CHA system. The reporter is four LNA nucleotides-containing hybridized DNA duplex (detailed site, see **Table S1**) with a FAM-labeled strand Rep-F and a BHQ-1-labeled strand Rep-Q (FAM denoted as 6-carboxy fluorescein; BHQ-1 denoted as Black Hole Quencher-1), resulting in the fluorescence quenching via the fluorescence resonance energy transfer (FRET) mechanism. Hybridization of hairpin H<sub>1</sub> and hairpin H<sub>2</sub> exposes the domain 2\* of hairpin H<sub>1</sub>, which docks to the toehold 2 of Rep-F and leads to the separation of Rep-Q via toehold-mediated strand displacement, thus generating high fluorescence readout.

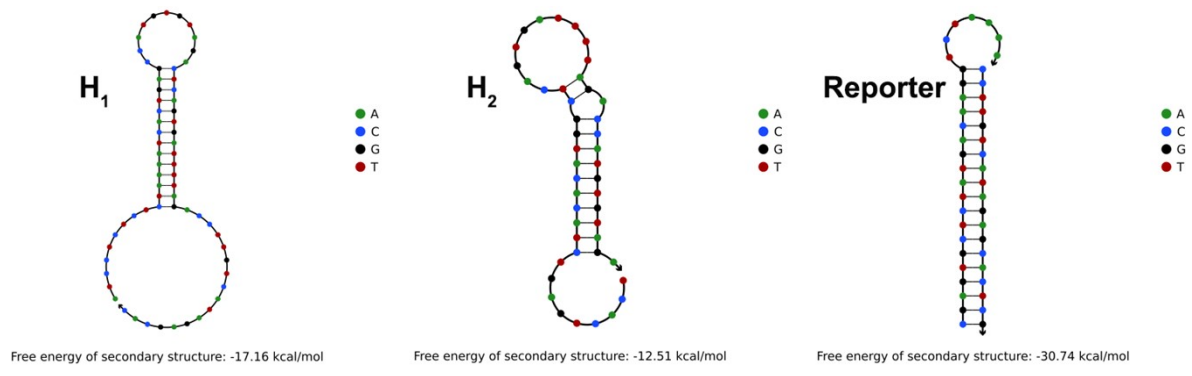

**Fig. S3** Optimized structures of the updated CHA constructs H<sub>1</sub>, H<sub>2</sub> and reporter by theoretical calculations.

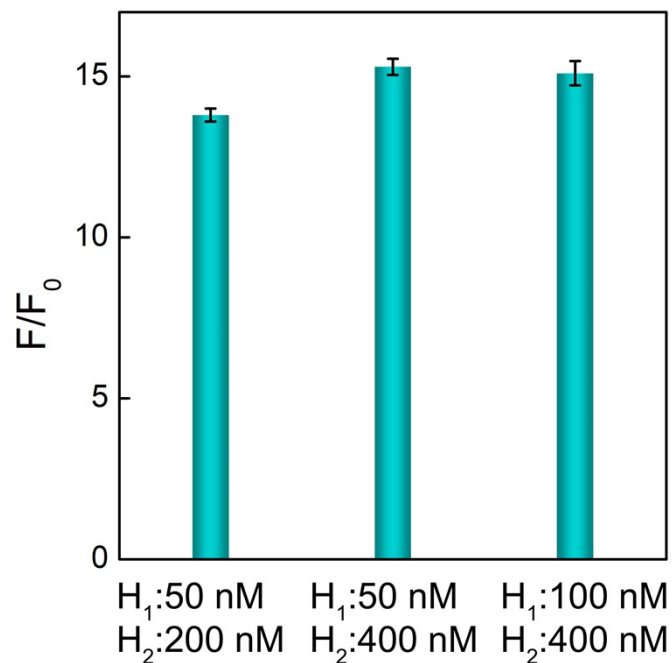

**Fig. S4** Optimized concentration of metastable LNA-incorporated hairpins in the updated CHA system.  $H_1$  (50 nM, 100 nM),  $H_2$  (200 nM, 400 nM), reporter (50 nM) and target ctDNA (5 nM).  $F$  and  $F_0$  refer to the fluorescence intensity with and without target ctDNA, respectively. The reaction time is set as 40 min, and the reaction temperature is set as 37°C. Results are presented as means  $\pm$  standard deviation (SD) (n=3).

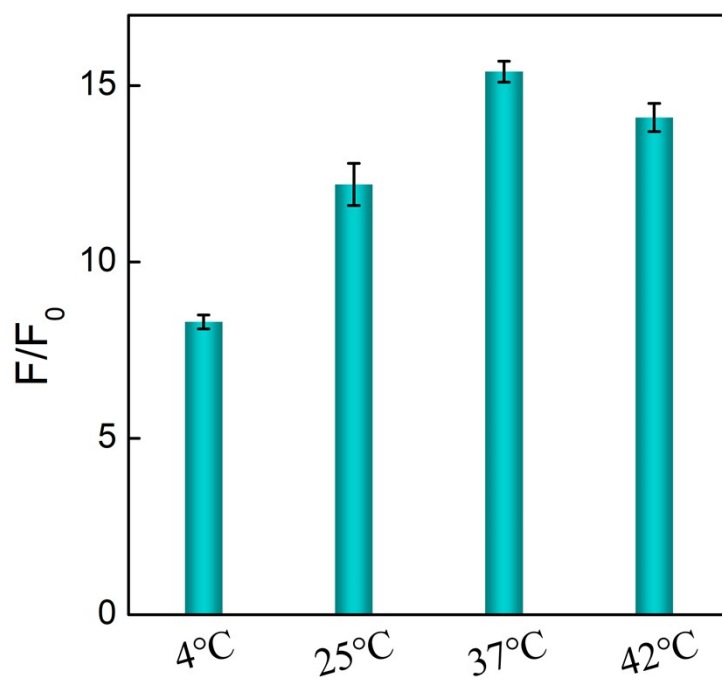

**Fig. S5** Optimized reaction temperature of metastable LNA-incorporated hairpin in the updated CHA system.  $H_1$  (50 nM),  $H_2$  (400 nM), reporter (50 nM) and target ctDNA (5 nM).  $F$  and  $F_0$  refer to the fluorescence intensity with and without target ctDNA, respectively. The reaction time is set as 40 min. Results are presented as means  $\pm$  standard deviation (SD) ( $n=3$ ).



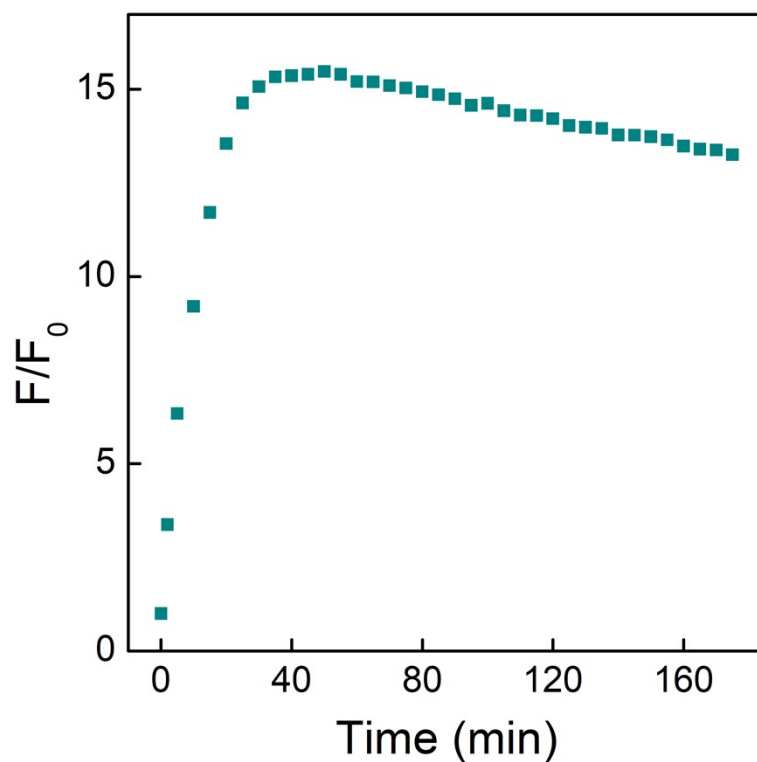

**Fig. S6** Fluorescence kinetics of the updated CHA system in the presence of target ctDNA (5 nM). The used concentrations of constituents are hairpin  $H_1$  (50 nM),  $H_2$  (400 nM) and reporter (50 nM).  $F$  and  $F_0$  refer to the fluorescence intensity with and without target ctDNA, respectively. The reaction temperature is set as 37°C.

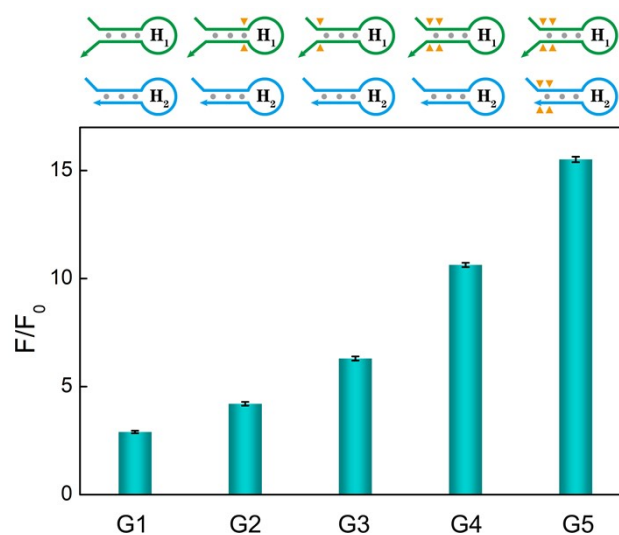

**Fig. S7** Fluorescence response of the CHA system to target ctDNA introducing different LNAs number and location within hairpins. The component concentration is H<sub>1</sub> (50 nM), H<sub>2</sub> (400 nM) and reporter (50 nM). The reaction time is set as 40 min, and the reaction temperature is set as 37°C. F and F<sub>0</sub> refer to the fluorescence intensity with and without target ctDNA (5 nM), respectively. Results are presented as means ± standard deviation (SD) (n=3).

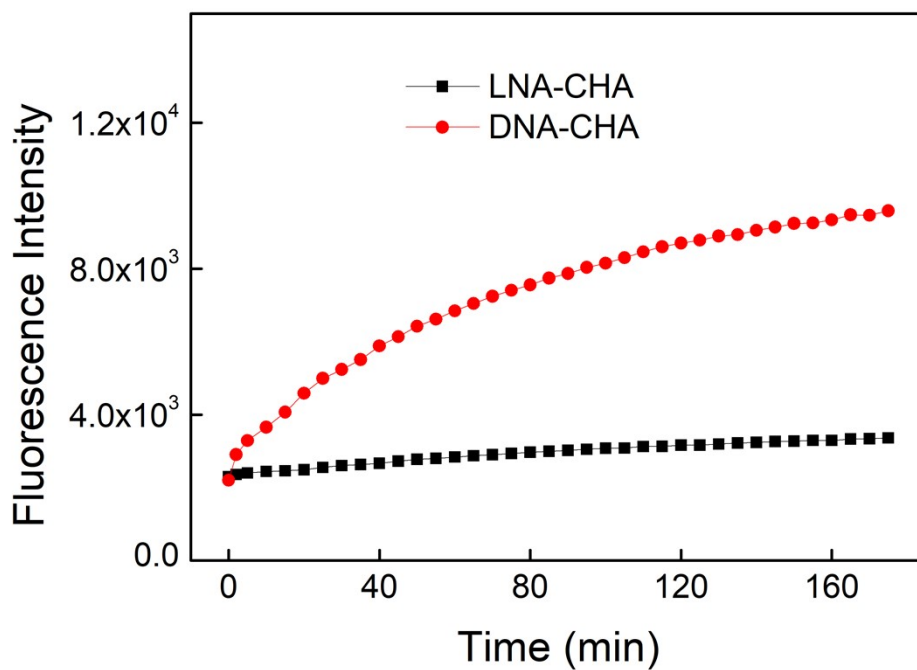

**Fig. S8** Fluorescence kinetics of locked nucleic acid-modified CHA system (LNA-CHA) and regular CHA system (DNA-CHA) in MCF-7 cell lysate. The used concentrations of constituents are hairpin H<sub>1</sub> (50 nM), H<sub>2</sub> (400 nM) and reporter (50 nM). The reaction temperature is set as 37°C.

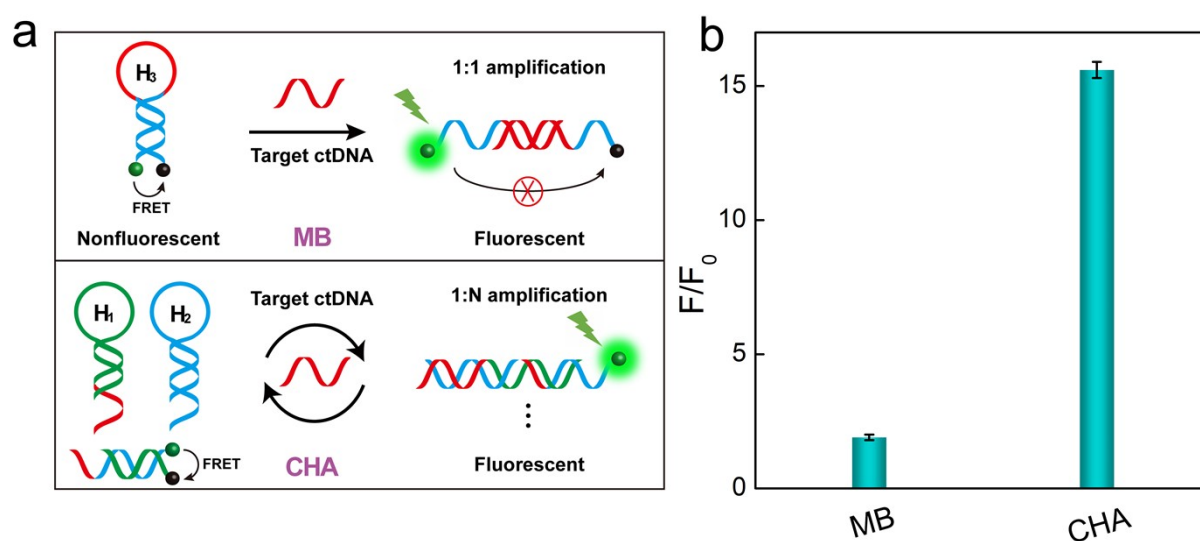

**Fig. S9** (a) Illustration of updated CHA system and molecular beacon (MB) system for catalytic signal enhancement of target ctDNA. (b) Fluorescence amplification capability of CHA system is compared with MB system **in the presence of target ctDNA (5 nM)**.  $F$  and  $F_0$  refer to the fluorescence intensity with and without target ctDNA, respectively.  $H_1$  (50 nM),  $H_2$  (400 nM), reporter (50 nM), and  $H_3$  (50 nM). The reaction time is set as 40 min, and the reaction temperature is set as 37°C. Results are presented as means  $\pm$  standard deviation (SD) ( $n=3$ ).

**Table S2.** Comparison of analytical performances of different ctDNA biosensors.

| <b>Method</b>                       | <b>Detection limit</b> | <b>Linear range</b>       | <b>Enzyme</b> | <b>Convenience</b>        | <b>Ref.</b> |
|-------------------------------------|------------------------|---------------------------|---------------|---------------------------|-------------|
| Surface-enhanced Raman scattering   | 0.3 fM                 | 10-10 <sup>6</sup> fM     | Required      | Multiple steps<br>90 min  | S1          |
| Localized surface plasmon resonance | 200 fM                 | 50-3.2×10 <sup>3</sup> fM | Not required  | Multiple steps<br>>2 h    | S2          |
| Colorimetry                         | 100 fM                 | 500-5×10 <sup>5</sup> fM  | Not required  | Multiple steps<br>4 h     | S3          |
| Electrochemistry                    | 0.5 nM                 | 0.5-50 nM                 | Not required  | Multiple steps<br>>2 h    | S4          |
| Electrochemistry                    | 8.3 fM                 | 10-5×10 <sup>6</sup> fM   | Not required  | Multiple steps<br>>2 h    | S5          |
| Electrochemistry                    | 5 fM                   | 0.2-20×10 <sup>6</sup> fM | Not required  | Multiple steps<br>20 min  | S6          |
| Fluorescence                        | 0.22 fM                | 1-1×10 <sup>5</sup> fM    | Required      | One step<br>4 h           | S7          |
| Fluorescence                        | 0.16 fM                | 0.2-2×10 <sup>8</sup> fM  | Required      | Multiple steps<br>120 min | S8          |
| Fluorescence                        | 3.3 pM                 | 10-1×10 <sup>3</sup> pM   | Not required  | One step<br>40 min        | This work   |

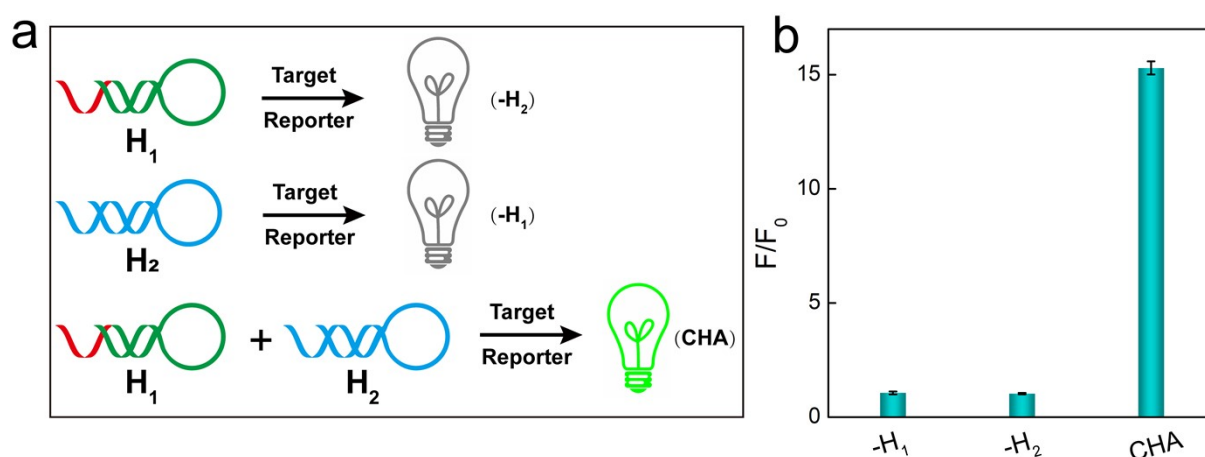

**Fig. S10** (a) Schematic illustration and (b) fluorescence response of the updated CHA system that was subtracted by H<sub>1</sub> alone, or by H<sub>2</sub> alone, and the intact CHA system. H<sub>1</sub> (50 nM), H<sub>2</sub> (400 nM) and reporter (50 nM) in the presence of target ctDNA (5 nM). The reaction time is set as 40 min, and the reaction temperature is set as 37°C. F and F<sub>0</sub> refer to the fluorescence intensity with and without target ctDNA, respectively. Results are presented as means ± standard deviation (SD) (n=3).

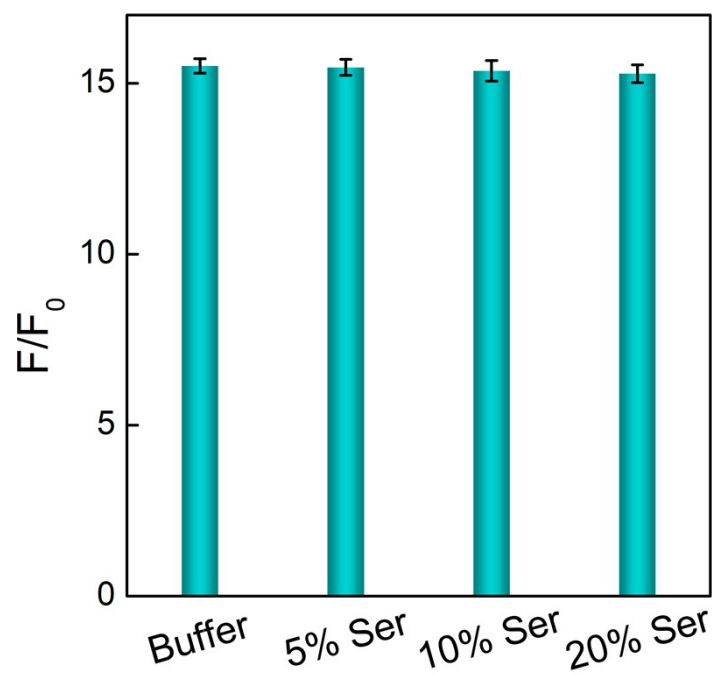

**Fig. S11** Fluorescence response of the updated CHA system to target ctDNA in different ratios of fetal bovine serums: buffer, 5% serum, 10% serum, and 20% serum. H<sub>1</sub> (50 nM), H<sub>2</sub> (400 nM) and reporter (50 nM). The reaction time is set as 40 min, and the reaction temperature is set as 37°C. F and F<sub>0</sub> refer to the fluorescence intensity with and without target ctDNA (5 nM), respectively. Results are presented as means ± standard deviation (SD) (n=3).

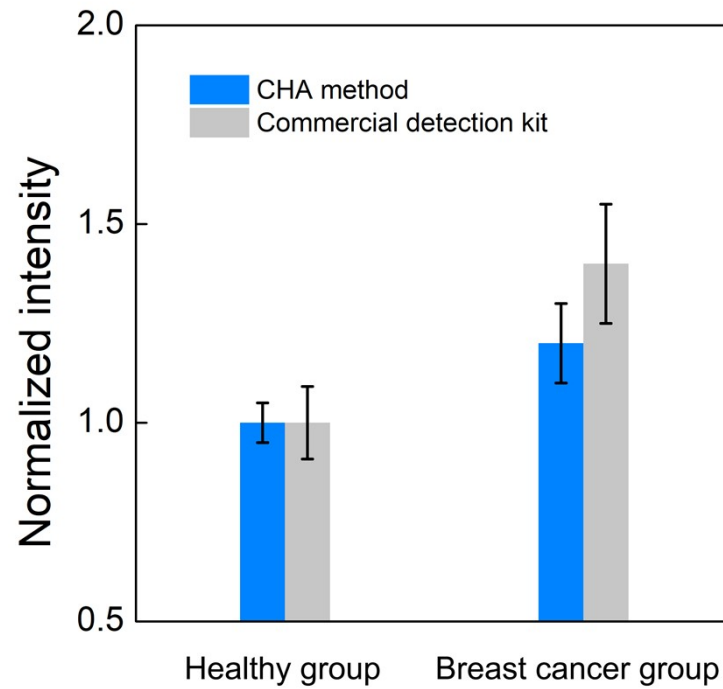

**Fig. S12** Clinical samples analysis of ctDNA through CHA method and commercial detection kit. Normalization is performed against healthy group. Results are presented as means  $\pm$  standard deviation (SD) (n=3).



## References

- S1. Q. Zhou, J. Zheng, Z. Qing, M. Zheng, J. Yang, S. Yang, L. Ying and R. Yang, *Anal. Chem.*, 2016, **88**, 4759-4765.
- S2. A. H. Nguyen and S. J. Sim, *Biosens. Bioelectron.*, 2015, **67**, 443-449.
- S3. R. Li, L. Zou, Y. Luo, M. Zhang and L. Ling, *Sci. Rep.*, 2017, **7**, 44212.
- S4. Y. Huang, M. Tao, S. Luo, Y. Zhang, B. Situ, X. Ye, P. Chen, X. Jiang, Q. Wang and L. Zhang, *Anal. Chim. Acta*, 2020, **1107**, 40-47.
- S5. S. Luo, Y. Zhang, G. Huang, B. Situ, X. Ye, M. Tao, Y. Huang, B. Li, X. Jiang, Q. Wang and L. Zheng, *Sens. Actuators B Chem.*, 2021, **338**, 129857.
- S6. D. Chen, Y. Wu, S. Hoque, R. D. Tilley and J. J. Gooding, *Chem. Sci.*, 2021, **12**, 5196-5201.
- S7. W. Zhou, L. Wang, C. Liu, Q. Teng, Z. Wang and Z. Dai, *Chem. Sci.*, 2020, **11**, 3745-3751.
- S8. X. Cheng, Y. Bao, S. Liang, B. Li, Y. Liu, H. Wu, X. Ma, Y. Chu, Y. Shao, Q. Meng, G. Zhou, Q. Song and B. Zou, *Anal. Chem.*, 2021, **93**, 9593-9601.
